# Supplementary material for: Quantitative profiling of posttranslational modifications of pathological tau via sarkosyl fractionation and mass spectrometry
Source: Springer Nature journal article supplement (doi:10.1038/s41596-023-00939-z), 2024-01-30
Supplement: MOESM2 [file 41596_2023_939_MOESM2_ESM6.xlsx]

## Sheet: Transition_list
Peptide sequence	labeling	Peptide charge	Peptide m/z	Fragment	Fragment charge	Fragment m/z
QEFEVMEDHAGTYGLGDR	light	3+	685.302	y11	1+	1161.53
QEFEVMEDHAGTYGLGDR	light	3+	685.302	y10	1+	1046.5
QEFEVMEDHAGTYGLGDR	light	3+	685.302	y9	1+	909.442
QEFEVMEDHAGTYGLGDR	light	3+	685.302	y8	1+	838.405
QEFEVMEDHAGTYGLGDR	heavy	3+	688.638	y11	1+	1171.54
QEFEVMEDHAGTYGLGDR	heavy	3+	688.638	y10	1+	1056.51
QEFEVMEDHAGTYGLGDR	heavy	3+	688.638	y9	1+	919.451
QEFEVMEDHAGTYGLGDR	heavy	3+	688.638	y8	1+	848.414
QEFEVM[Oxi]EDHAGTYGLGDR	light	3+	690.634	y11	1+	1161.53
QEFEVM[Oxi]EDHAGTYGLGDR	light	3+	690.634	y10	1+	1046.5
QEFEVM[Oxi]EDHAGTYGLGDR	light	3+	690.634	y9	1+	909.442
QEFEVM[Oxi]EDHAGTYGLGDR	light	3+	690.634	y8	1+	838.405
QEFEVM[Oxi]EDHAGTYGLGDR	heavy	3+	693.97	y11	1+	1171.54
QEFEVM[Oxi]EDHAGTYGLGDR	heavy	3+	693.97	y10	1+	1056.51
QEFEVM[Oxi]EDHAGTYGLGDR	heavy	3+	693.97	y9	1+	919.451
QEFEVM[Oxi]EDHAGTYGLGDR	heavy	3+	693.97	y8	1+	848.414
QEFEVMEDHAGTYGLGDRK	light	4+	546.252	y9	1+	966.5
QEFEVMEDHAGTYGLGDRK	light	4+	546.252	y5	1+	588.346
QEFEVMEDHAGTYGLGDRK	light	4+	546.252	y4	1+	475.262
QEFEVMEDHAGTYGLGDRK	heavy	4+	550.259	y9	1+	982.529
QEFEVMEDHAGTYGLGDRK	heavy	4+	550.259	y5	1+	604.375
QEFEVMEDHAGTYGLGDRK	heavy	4+	550.259	y4	1+	491.291
QEFEVM[Oxi]EDHAGTYGLGDRK	light	4+	550.251	y7	1+	808.431
QEFEVM[Oxi]EDHAGTYGLGDRK	light	4+	550.251	y6	1+	645.368
QEFEVM[Oxi]EDHAGTYGLGDRK	light	4+	550.251	y5	1+	588.346
QEFEVM[Oxi]EDHAGTYGLGDRK	light	4+	550.251	y4	1+	475.262
QEFEVM[Oxi]EDHAGTYGLGDRK	heavy	4+	554.258	y7	1+	824.46
QEFEVM[Oxi]EDHAGTYGLGDRK	heavy	4+	554.258	y6	1+	661.396
QEFEVM[Oxi]EDHAGTYGLGDRK	heavy	4+	554.258	y5	1+	604.375
QEFEVM[Oxi]EDHAGTYGLGDRK	heavy	4+	554.258	y4	1+	491.291
KDQGGYTMHQDQEGDTDAGLK	light	4+	574.255	y6	1+	604.33
KDQGGYTMHQDQEGDTDAGLK	light	4+	574.255	y5	1+	503.282
KDQGGYTMHQDQEGDTDAGLK	light	4+	574.255	y4	1+	388.255
KDQGGYTMHQDQEGDTDAGLK	heavy	4+	577.265	y6	1+	610.35
KDQGGYTMHQDQEGDTDAGLK	heavy	4+	577.265	y5	1+	509.303
KDQGGYTMHQDQEGDTDAGLK	heavy	4+	577.265	y4	1+	394.276
KDQGGYTM[Oxi]HQDQEGDTDAGLK	light	4+	578.254	y8	1+	776.378
KDQGGYTM[Oxi]HQDQEGDTDAGLK	light	4+	578.254	y6	1+	604.33
KDQGGYTM[Oxi]HQDQEGDTDAGLK	light	4+	578.254	y4	1+	388.255
KDQGGYTM[Oxi]HQDQEGDTDAGLK	heavy	4+	581.264	y8	1+	782.399
KDQGGYTM[Oxi]HQDQEGDTDAGLK	heavy	4+	581.264	y6	1+	610.35
KDQGGYTM[Oxi]HQDQEGDTDAGLK	heavy	4+	581.264	y4	1+	394.276
DQGGYTMHQDQEGDTDAGLK	light	3+	722.64	y9	1+	905.421
DQGGYTMHQDQEGDTDAGLK	light	3+	722.64	y8	1+	776.378
DQGGYTMHQDQEGDTDAGLK	light	3+	722.64	y4	1+	388.255
DQGGYTMHQDQEGDTDAGLK	heavy	3+	724.646	y9	1+	911.441
DQGGYTMHQDQEGDTDAGLK	heavy	3+	724.646	y8	1+	782.399
DQGGYTMHQDQEGDTDAGLK	heavy	3+	724.646	y4	1+	394.276
DQGGYTM[Oxi]HQDQEGDTDAGLK	light	3+	727.971	y11	1+	1148.51
DQGGYTM[Oxi]HQDQEGDTDAGLK	light	3+	727.971	y8	1+	776.378
DQGGYTM[Oxi]HQDQEGDTDAGLK	light	3+	727.971	y4	1+	388.255
DQGGYTM[Oxi]HQDQEGDTDAGLK	heavy	3+	729.978	y11	1+	1154.53
DQGGYTM[Oxi]HQDQEGDTDAGLK	heavy	3+	729.978	y8	1+	782.399
DQGGYTM[Oxi]HQDQEGDTDAGLK	heavy	3+	729.978	y4	1+	394.276
ESPLQTPTEDGSEEPGSETSDAK	light	3+	797.682	y10	1+	1020.45
ESPLQTPTEDGSEEPGSETSDAK	light	3+	797.682	y9	1+	891.405
ESPLQTPTEDGSEEPGSETSDAK	heavy	3+	799.689	y10	1+	1026.47
ESPLQTPTEDGSEEPGSETSDAK	heavy	3+	799.689	y9	1+	897.426
STPTAEDVTAPLVDEGAPGK	light	2+	977.984	y12	1+	1154.61
STPTAEDVTAPLVDEGAPGK	light	2+	977.984	y10	1+	982.52
STPTAEDVTAPLVDEGAPGK	light	2+	977.984	y3	1+	301.187
STPTAEDVTAPLVDEGAPGK	heavy	2+	980.994	y12	1+	1160.63
STPTAEDVTAPLVDEGAPGK	heavy	2+	980.994	y10	1+	988.541
STPTAEDVTAPLVDEGAPGK	heavy	2+	980.994	y3	1+	307.207
QAAAQPHTEIPEGTTAEEAGIGDTPSLEDEAAGHVTQAR	light	4+	989.719	y8	1+	839.448
QAAAQPHTEIPEGTTAEEAGIGDTPSLEDEAAGHVTQAR	light	4+	989.719	y7	1+	768.411
QAAAQPHTEIPEGTTAEEAGIGDTPSLEDEAAGHVTQAR	light	4+	989.719	y4	1+	475.262
QAAAQPHTEIPEGTTAEEAGIGDTPSLEDEAAGHVTQAR	light	4+	989.719	y20	2+	1012.49
QAAAQPHTEIPEGTTAEEAGIGDTPSLEDEAAGHVTQAR	heavy	4+	992.221	y8	1+	849.456
QAAAQPHTEIPEGTTAEEAGIGDTPSLEDEAAGHVTQAR	heavy	4+	992.221	y7	1+	778.419
QAAAQPHTEIPEGTTAEEAGIGDTPSLEDEAAGHVTQAR	heavy	4+	992.221	y4	1+	485.271
QAAAQPHTEIPEGTTAEEAGIGDTPSLEDEAAGHVTQAR	heavy	4+	992.221	y20	2+	1017.49
GAAPPGQK	light	2+	363.201	y6	1+	597.335
GAAPPGQK	light	2+	363.201	y5	1+	526.298
GAAPPGQK	light	2+	363.201	y4	1+	429.246
GAAPPGQK	heavy	2+	366.211	y6	1+	603.356
GAAPPGQK	heavy	2+	366.211	y5	1+	532.319
GAAPPGQK	heavy	2+	366.211	y4	1+	435.266
TPPAPK	light	2+	305.682	y5	1+	509.308
TPPAPK	light	2+	305.682	y4	1+	412.255
TPPAPK	light	2+	305.682	y3	1+	315.203
TPPAPK	heavy	2+	308.692	y5	1+	515.328
TPPAPK	heavy	2+	308.692	y4	1+	418.276
TPPAPK	heavy	2+	308.692	y3	1+	321.223
TPPSSGEPPK	light	2+	498.753	y8	1+	798.399
TPPSSGEPPK	light	2+	498.753	y7	1+	701.346
TPPSSGEPPK	light	2+	498.753	y6	1+	614.314
TPPSSGEPPK	light	2+	498.753	y3	1+	341.218
TPPSSGEPPK	heavy	2+	501.764	y8	1+	804.419
TPPSSGEPPK	heavy	2+	501.764	y7	1+	707.367
TPPSSGEPPK	heavy	2+	501.764	y6	1+	620.335
TPPSSGEPPK	heavy	2+	501.764	y3	1+	347.238
SGYSSPGSPGTPGSR	light	2+	697.321	y10	1+	912.453
SGYSSPGSPGTPGSR	light	2+	697.321	y7	1+	671.347
SGYSSPGSPGTPGSR	light	2+	697.321	y4	1+	416.225
SGYSSPGSPGTPGSR	heavy	2+	702.325	y10	1+	922.462
SGYSSPGSPGTPGSR	heavy	2+	702.325	y7	1+	681.355
SGYSSPGSPGTPGSR	heavy	2+	702.325	y4	1+	426.233
SRTPSLPTPPTR	light	3+	437.246	y4	1+	470.272
SRTPSLPTPPTR	light	3+	437.246	b5	1+	529.273
SRTPSLPTPPTR	light	3+	437.246	b6	1+	642.357
SRTPSLPTPPTR	heavy	3+	443.918	y4	1+	480.28
SRTPSLPTPPTR	heavy	3+	443.918	b5	1+	539.281
SRTPSLPTPPTR	heavy	3+	443.918	b6	1+	652.365
TPSLPTPPTR	light	2+	533.798	y8	1+	868.489
TPSLPTPPTR	light	2+	533.798	y6	1+	668.373
TPSLPTPPTR	light	2+	533.798	y4	1+	470.272
TPSLPTPPTR	heavy	2+	538.802	y8	1+	878.497
TPSLPTPPTR	heavy	2+	538.802	y6	1+	678.381
TPSLPTPPTR	heavy	2+	538.802	y4	1+	480.28
TPSLPTPPTREPK	light	3+	474.265	y8	1+	925.51
TPSLPTPPTREPK	light	3+	474.265	y7	1+	824.462
TPSLPTPPTREPK	heavy	3+	479.607	y8	1+	941.539
TPSLPTPPTREPK	heavy	3+	479.607	y7	1+	840.491
LQTAPVPMPDLK	light	2+	655.363	y8	1+	896.491
LQTAPVPMPDLK	light	2+	655.363	y6	1+	700.37
LQTAPVPMPDLK	light	2+	655.363	b3	1+	343.198
LQTAPVPMPDLK	heavy	2+	658.373	y8	1+	902.511
LQTAPVPMPDLK	heavy	2+	658.373	y6	1+	706.39
LQTAPVPMPDLK	heavy	2+	658.373	b3	1+	343.198
LQTAPVPM[Oxi]PDLK	light	2+	663.36	y8	1+	912.486
LQTAPVPM[Oxi]PDLK	light	2+	663.36	y6	1+	716.365
LQTAPVPM[Oxi]PDLK	light	2+	663.36	b3	1+	343.198
LQTAPVPM[Oxi]PDLK	heavy	2+	666.37	y8	1+	918.506
LQTAPVPM[Oxi]PDLK	heavy	2+	666.37	y6	1+	722.385
LQTAPVPM[Oxi]PDLK	heavy	2+	666.37	b3	1+	343.198
IGSTENLK	light	2+	431.237	y7	1+	748.384
IGSTENLK	light	2+	431.237	y6	1+	691.362
IGSTENLK	light	2+	431.237	y3	1+	374.24
IGSTENLK	heavy	2+	434.248	y7	1+	754.404
IGSTENLK	heavy	2+	434.248	y6	1+	697.382
IGSTENLK	heavy	2+	434.248	y3	1+	380.26
VQIINKK	light	2+	421.777	y6	1+	743.477
VQIINKK	light	2+	421.777	y5	1+	615.419
VQIINKK	light	2+	421.777	y4	1+	502.335
VQIINKK	heavy	2+	427.797	y6	1+	755.518
VQIINKK	heavy	2+	427.797	y5	1+	627.459
VQIINKK	heavy	2+	427.797	y4	1+	514.375
VQIINK	light	2+	357.729	y5	1+	615.382
VQIINK	light	2+	357.729	y4	1+	487.324
VQIINK	light	2+	357.729	y3	1+	374.24
VQIINK	heavy	2+	360.739	y5	1+	621.403
VQIINK	heavy	2+	360.739	y4	1+	493.344
VQIINK	heavy	2+	360.739	y3	1+	380.26
KLDLSNVQSK	light	2+	566.322	y9	1+	1003.54
KLDLSNVQSK	light	2+	566.322	y8	1+	890.458
KLDLSNVQSK	light	2+	566.322	y6	1+	662.347
KLDLSNVQSK	heavy	2+	572.342	y9	1+	1009.56
KLDLSNVQSK	heavy	2+	572.342	y8	1+	896.478
KLDLSNVQSK	heavy	2+	572.342	y6	1+	668.367
LDLSNVQSK	light	2+	502.275	y7	1+	775.431
LDLSNVQSK	light	2+	502.275	y6	1+	662.347
LDLSNVQSK	light	2+	502.275	y5	1+	575.315
LDLSNVQSK	heavy	2+	505.285	y7	1+	781.451
LDLSNVQSK	heavy	2+	505.285	y6	1+	668.367
LDLSNVQSK	heavy	2+	505.285	y5	1+	581.335
HVPGGGSVQIVYKPVDLSK	light	3+	660.702	y10	1+	1161.69
HVPGGGSVQIVYKPVDLSK	light	3+	660.702	y9	1+	1048.6
HVPGGGSVQIVYKPVDLSK	light	3+	660.702	y8	1+	949.535
HVPGGGSVQIVYKPVDLSK	light	3+	660.702	y15	2+	795.449
HVPGGGSVQIVYKPVDLSK	heavy	3+	664.715	y10	1+	1173.73
HVPGGGSVQIVYKPVDLSK	heavy	3+	664.715	y9	1+	1060.64
HVPGGGSVQIVYKPVDLSK	heavy	3+	664.715	y8	1+	961.576
HVPGGGSVQIVYKPVDLSK	heavy	3+	664.715	y15	2+	801.469
HVPGGGSVQIVYKPVDLSK	light	4+	495.778	y6	1+	658.377
HVPGGGSVQIVYKPVDLSK	light	4+	495.778	y11	2+	645.377
HVPGGGSVQIVYKPVDLSK	light	4+	495.778	y10	2+	581.348
HVPGGGSVQIVYKPVDLSK	light	4+	495.778	y17	3+	581.993
HVPGGGSVQIVYKPVDLSK	heavy	4+	498.788	y6	1+	664.397
HVPGGGSVQIVYKPVDLSK	heavy	4+	498.788	y11	2+	651.397
HVPGGGSVQIVYKPVDLSK	heavy	4+	498.788	y10	2+	587.368
HVPGGGSVQIVYKPVDLSK	heavy	4+	498.788	y17	3+	586.006
IGSLDNITHVPGGGNK	light	3+	526.946	y9	1+	866.448
IGSLDNITHVPGGGNK	light	3+	526.946	y7	1+	628.341
IGSLDNITHVPGGGNK	light	3+	526.946	y6	1+	529.273
IGSLDNITHVPGGGNK	heavy	3+	528.953	y9	1+	872.468
IGSLDNITHVPGGGNK	heavy	3+	528.953	y7	1+	634.361
IGSLDNITHVPGGGNK	heavy	3+	528.953	y6	1+	535.293
TDHGAEIVYK	light	3+	378.193	y3	1+	409.245
TDHGAEIVYK	light	3+	378.193	y2	1+	310.176
TDHGAEIVYK	light	3+	378.193	b6	1+	611.242
TDHGAEIVYK	heavy	3+	380.199	y3	1+	415.265
TDHGAEIVYK	heavy	3+	380.199	y2	1+	316.196
TDHGAEIVYK	heavy	3+	380.199	b6	1+	611.242
SPVVSGDTSPR	light	2+	551.28	y8	1+	818.4
SPVVSGDTSPR	light	2+	551.28	y7	1+	719.332
SPVVSGDTSPR	light	2+	551.28	y6	1+	632.3
SPVVSGDTSPR	heavy	2+	556.285	y8	1+	828.409
SPVVSGDTSPR	heavy	2+	556.285	y7	1+	729.34
SPVVSGDTSPR	heavy	2+	556.285	y6	1+	642.308
HLSNVSSTGSIDM[Oxi]VDSPQLATLADEVSASLAK	light	3+	1087.2	y10	1+	990.51
HLSNVSSTGSIDM[Oxi]VDSPQLATLADEVSASLAK	light	3+	1087.2	y9	1+	919.473
HLSNVSSTGSIDM[Oxi]VDSPQLATLADEVSASLAK	light	3+	1087.2	b5	1+	551.294
HLSNVSSTGSIDM[Oxi]VDSPQLATLADEVSASLAK	heavy	3+	1089.21	y10	1+	996.53
HLSNVSSTGSIDM[Oxi]VDSPQLATLADEVSASLAK	heavy	3+	1089.21	y9	1+	925.493
HLSNVSSTGSIDM[Oxi]VDSPQLATLADEVSASLAK	heavy	3+	1089.21	b5	1+	551.294
HLSNVSSTGSIDMVDSPQLATLADEVSASLAK	light	3+	1081.87	y10	1+	990.51
HLSNVSSTGSIDMVDSPQLATLADEVSASLAK	light	3+	1081.87	y9	1+	919.473
HLSNVSSTGSIDMVDSPQLATLADEVSASLAK	light	3+	1081.87	y6	1+	576.335
HLSNVSSTGSIDMVDSPQLATLADEVSASLAK	heavy	3+	1083.88	y10	1+	996.53
HLSNVSSTGSIDMVDSPQLATLADEVSASLAK	heavy	3+	1083.88	y9	1+	925.493
HLSNVSSTGSIDMVDSPQLATLADEVSASLAK	heavy	3+	1083.88	y6	1+	582.355
SENLYFQGDISR	light	2+	714.841	y9	1+	1098.56
SENLYFQGDISR	light	2+	714.841	y8	1+	985.474
SENLYFQGDISR	light	2+	714.841	y7	1+	822.41
SENLYFQGDISR	light	2+	714.841	b6	1+	754.341
SENLYFQGDISR	heavy	2+	719.845	y9	1+	1108.57
SENLYFQGDISR	heavy	2+	719.845	y8	1+	995.482
SENLYFQGDISR	heavy	2+	719.845	y7	1+	832.419
SENLYFQGDISR	heavy	2+	719.845	b6	1+	754.341
HVLGGGSVQIVYK[UGG]PVDLSK	light	4+	528.297	y6	1+	658.377
HVLGGGSVQIVYK[UGG]PVDLSK	light	4+	528.297	y8	2+	532.293
HVLGGGSVQIVYK[UGG]PVDLSK	light	4+	528.297	y16	3+	587.656
HVLGGGSVQIVYK[UGG]PVDLSK	light	4+	528.297	b7	1+	608.315
HVLGGGSVQIVYK[UGG]PVDLSK	light	4+	528.297	b8	1+	707.383
HVLGGGSVQIVYK[UGG]PVDLSK	heavy	4+	530.3	y6	1+	666.391
HVLGGGSVQIVYK[UGG]PVDLSK	heavy	4+	530.3	y8	2+	536.3
HVLGGGSVQIVYK[UGG]PVDLSK	heavy	4+	530.3	y16	3+	590.328
HVLGGGSVQIVYK[UGG]PVDLSK	heavy	4+	530.3	b7	1+	608.315
HVLGGGSVQIVYK[UGG]PVDLSK	heavy	4+	530.3	b8	1+	707.383
AEEAGIGDTPSLEDEAAGHVTQAR	light	3+	808.714	y7	1+	768.411
AEEAGIGDTPSLEDEAAGHVTQAR	light	3+	808.714	y4	1+	475.262
AEEAGIGDTPSLEDEAAGHVTQAR	light	3+	808.714	y16	2+	841.411
AEEAGIGDTPSLEDEAAGHVTQAR	light	3+	808.714	b3	1+	330.13
AEEAGIGDTPSLEDEAAGHVTQAR	heavy	3+	812.05	y7	1+	778.419
AEEAGIGDTPSLEDEAAGHVTQAR	heavy	3+	812.05	y4	1+	485.271
AEEAGIGDTPSLEDEAAGHVTQAR	heavy	3+	812.05	y16	2+	846.415
AEEAGIGDTPSLEDEAAGHVTQAR	heavy	3+	812.05	b3	1+	330.13
STPTAEAEEAGIGDTPSLEDEAAGHVTQAR	light	3+	1004.13	y8	1+	839.448
STPTAEAEEAGIGDTPSLEDEAAGHVTQAR	light	3+	1004.13	y7	1+	768.411
STPTAEAEEAGIGDTPSLEDEAAGHVTQAR	light	3+	1004.13	y4	1+	475.262
STPTAEAEEAGIGDTPSLEDEAAGHVTQAR	light	3+	1004.13	y20	2+	1012.49
STPTAEAEEAGIGDTPSLEDEAAGHVTQAR	heavy	3+	1007.47	y8	1+	849.456
STPTAEAEEAGIGDTPSLEDEAAGHVTQAR	heavy	3+	1007.47	y7	1+	778.419
STPTAEAEEAGIGDTPSLEDEAAGHVTQAR	heavy	3+	1007.47	y4	1+	485.271
STPTAEAEEAGIGDTPSLEDEAAGHVTQAR	heavy	3+	1007.47	y20	2+	1017.49
VQIVYKPVDLSK	light	3+	463.61	y7	1+	786.472
VQIVYKPVDLSK	light	3+	463.61	y6	1+	658.377
VQIVYKPVDLSK	heavy	3+	466.281	y7	1+	794.486
VQIVYKPVDLSK	heavy	3+	466.281	y6	1+	666.391
HVLGGGSVQIVYKPVDLSK	light	4+	499.786	y6	1+	658.377
HVLGGGSVQIVYKPVDLSK	light	4+	499.786	y11	2+	645.377
HVLGGGSVQIVYKPVDLSK	light	4+	499.786	y10	2+	581.348
HVLGGGSVQIVYKPVDLSK	light	4+	499.786	y17	3+	587.337
HVLGGGSVQIVYKPVDLSK	light	4+	499.786	b7	1+	608.315
HVLGGGSVQIVYKPVDLSK	heavy	4+	501.79	y6	1+	666.391
HVLGGGSVQIVYKPVDLSK	heavy	4+	501.79	y11	2+	649.384
HVLGGGSVQIVYKPVDLSK	heavy	4+	501.79	y10	2+	585.355
HVLGGGSVQIVYKPVDLSK	heavy	4+	501.79	y17	3+	590.008
HVLGGGSVQIVYKPVDLSK	heavy	4+	501.79	b7	1+	608.315
HVSGGGSVQIVYKPVDLSK	light	3+	657.362	y9	1+	1048.6
HVSGGGSVQIVYKPVDLSK	light	3+	657.362	y8	1+	949.535
HVSGGGSVQIVYKPVDLSK	light	3+	657.362	y17	2+	867.475
HVSGGGSVQIVYKPVDLSK	heavy	3+	660.033	y9	1+	1056.62
HVSGGGSVQIVYKPVDLSK	heavy	3+	660.033	y8	1+	957.55
HVSGGGSVQIVYKPVDLSK	heavy	3+	660.033	y17	2+	871.482
