# Supplementary material for: Quantitative profiling of posttranslational modifications of pathological tau via sarkosyl fractionation and mass spectrometry
Source: Springer Nature journal article supplement (doi:10.1038/s41596-023-00939-z), 2024-01-30
Supplement: MOESM5 [file 41596_2023_939_MOESM5_ESM8.xlsx]

## Sheet: Sheet1
Exported light/heavy ratios
specificity				1N/2N	1N	0N									3R	4R	4R	4R/P301L							FLEX
peptide		QEFEVMEDHAGTYGLGDR	DQGGYTMHQDQEGDTDAGLK	ESPLQTPTEDGSEEPGSETSDAK	STPTAEAEEAGIGDTPSLEDEAAGHVTQAR	AEEAGIGDTPSLEDEAAGHVTQAR	GAAPPGQK	TPPAPK	TPPSSGEPPK	SGYSSPGSPGTPGSR	TPSLPTPPTR	LQTAPVPMPDLK	IGSTENLK	VQIINK	VQIVYKPVDLSK	LDLSNVQSK	HVPGGGSVQIVYKPVDLSK	HVLGGGSVQIVYKPVDLSK	SEKLDFK	IGSLDNITHVPGGGNK	TDHGAEIVYK	SPVVSGDTSPR	HLSNVSSTGSIDMVDSPQLATLADEVSASLAK		SENLYFQGDISR
spiked in seperatly					X	X									X			X
measured light/heavy ratio		1.2758	0.438	0.0822	0.0278	0.0137	1.8897	1.375	2.5156	0.1294	0.3543	3.8536	1.28	0.6666	0.09963	1.6319	1.5343	0.0322	2.9928	4.0962	0.9494	0.1401	0.0765		1.03136
known concentrations of spiked peptides
	sequence				concentration in sample [fmol/ul]
FLEX peptide	SENLYFQGDISR				15
1N	STPTAEAEEAGIGDTPSLEDEAAGHVTQAR				50
0N	AEEAGIGDTPSLEDEAAGHVTQAR				50
3R	VQIVYKPVDLSK				50
P301L	HVLGGGSVQIVYKPVDLSK				50
absolute concentration of monitored peptides
specificity				1N/2N	1N	0N									3R	4R	4R	4R/P301L
peptide		QEFEVMEDHAGTYGLGDR	DQGGYTMHQDQEGDTDAGLK	ESPLQTPTEDGSEEPGSETSDAK	STPTAEAEEAGIGDTPSLEDEAAGHVTQAR	AEEAGIGDTPSLEDEAAGHVTQAR	GAAPPGQK	TPPAPK	TPPSSGEPPK	SGYSSPGSPGTPGSR	TPSLPTPPTR	LQTAPVPMPDLK	IGSTENLK	VQIINK	VQIVYKPVDLSK	LDLSNVQSK	HVPGGGSVQIVYKPVDLSK	HVLGGGSVQIVYKPVDLSK	SEKLDFK	IGSLDNITHVPGGGNK	TDHGAEIVYK	SPVVSGDTSPR	HLSNVSSTGSIDMVDSPQLATLADEVSASLAK
concentration [fmol/ul]		18.5551	6.37024	1.19551	1.39	0.685	27.4837	19.9979	36.5867	1.88198	5.15291	56.0465	18.6162	9.69498	4.9815	23.7342	22.3148	1.61	43.5271	59.5748	13.808	2.0376	1.11261
absolute concentration of total Tau in sample
mean concentration of 3 most abundant peptides [fmol/uL]				53.0495				Absolute concentration of Tau in sample [fmol/mg tissue]						56.9127
total sample volume (resuspension volume) [uL]				40
total volume of respective fraction [uL]				30
digested sample volume [uL]				14.2127
tissue weight [mg]				78.7
relative modification extent of each Tau peptide
specificity				1N/2N	1N	0N									3R	4R	4R	4R/P301L
peptide		QEFEVMEDHAGTYGLGDR	DQGGYTMHQDQEGDTDAGLK	ESPLQTPTEDGSEEPGSETSDAK	STPTAEAEEAGIGDTPSLEDEAAGHVTQAR	AEEAGIGDTPSLEDEAAGHVTQAR	GAAPPGQK	TPPAPK	TPPSSGEPPK	SGYSSPGSPGTPGSR	TPSLPTPPTR	LQTAPVPMPDLK	IGSTENLK	VQIINK	VQIVYKPVDLSK	LDLSNVQSK	HVPGGGSVQIVYKPVDLSK	HVLGGGSVQIVYKPVDLSK	SEKLDFK	IGSLDNITHVPGGGNK	TDHGAEIVYK	SPVVSGDTSPR	HLSNVSSTGSIDMVDSPQLATLADEVSASLAK
relative modification extent		0.349771	0.120081	0.0225358	0.026202	0.0129125	0.518076	0.376967	0.689672	0.035476	0.0971341	1.05649	0.350922	0.182754	0.0939029	0.447398	0.42064	0.030349	0.8205	1.12301	0.260285	0.0384095	0.0209731
1=unmodified
0=completly modified
